# Supplementary material
Source: PubMed Central journal article supplement (PMC4190650)
Supplement: mmc6.pdf [file mmc6.pdf]

## Article

## Uncovering the Mechanism of Trapping and Cell Orientation during *Neisseria gonorrhoeae* Twitching Motility

Vasily Zaburdaev,<sup>1</sup> Nicolas Biais,<sup>2,3</sup> Michael Schmiedeberg,<sup>4</sup> Jens Eriksson,<sup>5</sup> Ann-Beth Jonsson,<sup>6</sup> Michael P. Sheetz,<sup>2</sup> and David A. Weitz<sup>1,7,\*</sup>

<sup>1</sup>School of Engineering and Applied Sciences, Harvard University, Cambridge, Massachusetts; <sup>2</sup>Department of Biological Sciences, Columbia University, New York, New York; <sup>3</sup>Department of Biology, Brooklyn College, New York, New York; <sup>4</sup>Insitut für Theoretische Physik: Weiche Materie, Heinrich-Heine-Universität Düsseldorf, Düsseldorf, Germany; <sup>5</sup>Department of Microbiology, Oslo University Hospital, Oslo, Norway; <sup>6</sup>Department of Molecular Biosciences, the Wenner-Gren Institute, Stockholm University, Stockholm, Sweden; and <sup>7</sup>Department of Physics, Harvard University, Cambridge, Massachusetts

**ABSTRACT** *Neisseria gonorrhoeae* bacteria are the causative agent of the second most common sexually transmitted infection in the world. The bacteria move on a surface by means of twitching motility. Their movement is mediated by multiple long and flexible filaments, called type IV pili, that extend from the cell body, attach to the surface, and retract, thus generating a pulling force. Moving cells also use pili to aggregate and form microcolonies. However, the mechanism by which the pili surrounding the cell body work together to propel bacteria remains unclear. Understanding this process will help describe the motility of *N. gonorrhoeae* bacteria, and thus the dissemination of the disease which they cause. In this article we track individual twitching cells and observe that their trajectories consist of alternating moving and pausing intervals, while the cell body is preferably oriented with its wide side toward the direction of motion. Based on these data, we propose a model for the collective pili operation of *N. gonorrhoeae* bacteria that explains the experimentally observed behavior. Individual pili function independently but can lead to coordinated motion or pausing via the force balance. The geometry of the cell defines its orientation during motion. We show that by changing pili substrate interactions, the motility pattern can be altered in a predictable way. Although the model proposed is tangibly simple, it still has sufficient robustness to incorporate further advanced pili features and various cell geometries to describe other bacteria that employ pili to move on surfaces.

### INTRODUCTION

Motility plays a critical role in the lifecycle of bacteria. For example, planktonic bacteria swim with the help of flagella (1); this is the predominant means of transport through a fluid. In addition, there are many means of locomotion along a surface (2), which is of particular importance in the formation of biofilms, complex microbial communities that can colonize almost any kind of interface (3,4). Twitching motility is one important example of locomotion that allows cells to move on the surface as they form microcolonies, a process that is crucial for the initial stage of biofilm formation (5). Although bacteria use flagella for swimming, twitching motility relies on appendages called type IV pili (TFP); because of the irregular and jerky character of the cell motion, this type of motility has been called “twitching” (6). Pili are thin, long, and flexible filaments that can grow up to several microns and have a diameter of 6–9 nm (7–9). The pili are assembled from pilin subunits that are processed from within the cell. As a pilus grows, it can extend to a distance noticeably larger than the cell

size. When disassembly starts inside the cell, it shortens the pilus. If the pilus is attached to a surface, this shortening generates a pulling force that moves the cell. At the molecular level, TFP operation is driven by molecular motors that are similar in many Gram-negative bacteria, including *Pseudomonas aeruginosa*, *Myxococcus xanthus*, and *Neisseria gonorrhoeae* (7–9). The first direct measurements of the force generated by pili reported 100 pN, a record number for the microbial world (10). Shortly after, growth and retraction of pili were directly visualized in *P. aeruginosa* (11) and shown to be responsible for cell movement.

As of this writing, studies of twitching motility is a very active field of research. Recent work on *N. gonorrhoeae* (12,13) suggest that multiple pili and a tug-of-war mechanism are involved in cell motion. Twitching motility of rod-shaped *P. aeruginosa* bacteria was also studied in great detail (14–16). Studies of mechanobiology of TFP show the possibility of pili bundling and conformation changes (17,18).

Interestingly, medically relevant *N. gonorrhoeae* uses twitching exclusively to move on surfaces and interact with its environment. These bacteria can move at speeds as large as one cell size per second. Moving cells use pili to aggregate and form microcolonies which are also motile. Unfortunately, the thickness of pili of the order of several

Submitted March 25, 2014, and accepted for publication July 22, 2014.

\*Correspondence: [weitz@seas.harvard.edu](mailto:weitz@seas.harvard.edu)

Vasily Zaburdaev's current address is Max Planck Institute for the Physics of Complex Systems, 01187 Dresden, Germany.

Editor: Cecile Sykes.

© 2014 by the Biophysical Society  
0006-3495/14/10/1523/9 \$2.00

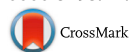

nanometers and the intolerance of the cell to fluorescent molecules make it difficult to visualize the dynamics of pili over long periods of time. Therefore, it remains unclear how the pili surrounding the *N. gonorrhoeae* cell body organize and propel the bacteria. Resolving this issue will lead to a better understanding of the dynamics of *N. gonorrhoeae* microcolony formation, a process critical to the progression of gonorrhea infection of human epithelia.

In this article, we combine experimental measurements and modeling to explain the nature of the twitching motility of *N. gonorrhoeae*. We track bacteria twitching on a surface for an extended period of time, and observe that individual trajectories consist of alternating pausing and moving intervals. In addition, during twitching, cells show a clear preference for motion in the direction normal to the longer axis of the cell body. We propose a simple model that describes the collective operation of pili and explains these experimental findings. We also test the predictions of the model by varying the conditions on the surface where cells move.

## MATERIALS AND METHODS

### Cells and imaging

The bacteria used in this work are MS11 wild-type strain bearing the same pilE sequence that was crystallized in Craig et al. (19). Bacteria were grown on GCB-medium base with agar (Becton Dickinson, Franklin Lakes, NJ) for 16–20 h at 37°C and 5% CO<sub>2</sub>. Before recording, the bacteria were resuspended at a concentration of  $5 \times 10^7$  bacteria/mL in liquid GCB (Gonococcal broth) medium. For 1 L: protease peptone No. 3, 15 g; K<sub>2</sub>HPO<sub>4</sub> 4 g, KH<sub>2</sub>PO<sub>4</sub> 1 g, NaCl 5 g, and 10 mL of Kellogg's Supplement 1: 100 g of Dextrose, 2.5 g of L-Glutamine, and 5 mg of thiamine pyrophosphate adjusted to 250 mL with water and 1 mL of Kellogg's Supplement 2: 1.25 g of Fe(NO<sub>3</sub>)<sub>3</sub>·9 H<sub>2</sub>O (ferric nitrate) adjusted to 250 mL with water. A quantity of 0.5 μL of the solution was added to 2 mL of DMEM medium (Gibco, Grand Island, NY) and then added to the bottom of the well of a 6-well tissue-culture plastic plate (Corning, Corning, NY). In the case of coating of the well, before the start of the experiment, either 2 mL of PBS (Growcells, Irvine, CA) with 30 μg/mL of Poly-L-Lysine (Sigma-Aldrich, Saint Louis, MO) or 2 mL of PBS with 1 mg/mL of bovine serum albumin (BSA, fraction V; Sigma-Aldrich) were added to the plate and left to interact for 1 h. Imaging was achieved by performing phase contrast microscopy with an inverted model No. IX81 microscope setup (Olympus, Center Valley, PA) with 40× air objective (Olympus) and a CoolSNAP digital camera (Photometrics, Tucson, AZ) providing grayscale images. A 1.5× magnifying lens was used for the 2-Hz recording.

### Quantification of pili length and number

MS11 bacteria were grown as indicated above for 16–20 h in 37°C and 5% CO<sub>2</sub>. Bacteria were resuspended at a concentration of 10<sup>9</sup> bacteria/mL and 10 μL of the suspension was deposited on a plastic petri dish. A formvar/carbon-coated electron microscopy grid (Electron Microscopy Sciences, Hatfield, PA) was allowed to float on top of the 10 μL drop for 10 min. Excess liquid was blotted on a lint-free Kimwipes tissue (Kimberly-Clark, Irving, TX) and transferred onto a 10-μL drop of 3.7% formaldehyde in PBS for 5 min. The excess liquid was again removed and the grid placed onto a solution of 1% uranyl acetate. The excess liquid was removed and the grid imaged on a transmission electron microscope (JEOL, Peabody, MA). The number and length of pili were determined by analyzing micrographs of 20 bacteria in the software IMAGEJ (National Institutes of

Health, Bethesda, MD). The number of pili obtained is  $N_p = 29 \pm 15$  (ranging 9–59) and length  $l_p = 1.2 \pm 0.4 \mu\text{m}$  (mean  $\pm$  SD) (compare Holz et al. (12) and Swanson et al. (20)).

### Amino labeling of bacteria for total internal reflection fluorescence microscopy

One 1-μL loop of bacteria grown on GCB solid media (Acumedia, Lansing, MI) for 16–18 h was gently resuspended in 60 μL sterile PBS, to which 3 μL of Dylight 488 NHS Ester (Thermo Scientific, Waltham, MA) suspension was added (10 mg/mL, diluted in dimethylformamide). After 10-min incubation at 37°C, 5 μL of the labeled bacterial suspension was added to 35 mm poly-D-lysine-coated glass bottom dishes (MatTek, Ashland, MA), containing 3 mL GCB supplemented with 10% Kellogg's supplement (D-glucose 222 mM, L-glutamine 0.342 mM, Fe(NO<sub>3</sub>)<sub>3</sub>·9 H<sub>2</sub>O 0.0124 mM, Cocarboxylase 0.434 mM) prewarmed to 37°C. The labeled bacteria were allowed to incubate for 20 min at 37°C in a 5% CO<sub>2</sub> atmosphere in the cell observer microscope (Carl Zeiss, Jena, Germany) before the start of the experiment. Live-cell time-lapse analysis was performed with total internal reflection fluorescence (TIRF) microscopy using a connected argon laser at 488 nm, and a 100× objective (NA 1.46; Carl Zeiss). Images were captured using an electron-multiplying charge-coupled device camera (Hamamatsu Photonics, Hamamatsu, Japan) at 12 images/s. Images captured during time-lapse experiments were further processed using Axiovision software (Carl Zeiss) and the software IMAGEJ (National Institutes of Health, Bethesda, MD).

### Data analysis

In total, we use 133 and 105 tracks for noncoated and BSA-coated surfaces, respectively. In a single field of view of the microscope, there are usually 1–5 cells out of which we select motile cells that do not interact with each other (trajectories do not intersect). We performed several sets of measurements on different days. Trajectories contain from 150 to 1550 time points with 1-Hz sampling frequency. For each trajectory, we measure its average speed, and by building a histogram of these speeds, check the uniformity of the ensemble of cells. The experimental data contain a time series of cell coordinates  $\mathbf{r}(t_i) = [x(t_i), y(t_i)]$ . Bacteria's velocity is determined as

$$\mathbf{v}(t_i) = \frac{\mathbf{r}(t_i + \delta t) - \mathbf{r}(t_i)}{\delta t}, \quad (1)$$

with  $\delta t = 1$  s. We use velocity and position data to identify trapping events: if the cell has a velocity below a threshold velocity  $v_{\text{th}} = 0.4 \mu\text{m/s}$  and does not move further than  $0.5 \mu\text{m}$ , it is in the trapped state. We check that the resulting distribution of trapping times is insensitive to the value of the threshold velocity in the range 0.3–0.5 μm/s and to the variation of the trap radius from 0.5 to 1 μm. The movement state occurs for motion of cells between consecutive traps. We calculate trapping and moving times for all trajectories to produce the corresponding distribution functions. For extracting the orientation of the cell during twitching, we use several tracks acquired with 2-Hz frequency. Similarly, a time series of each cell's velocity is obtained from its position. In addition to determining the position of the center of the cell, we use the software IMAGEJ (NIH) to extract the orientation of the cell (angle of the long axis of an ellipsoid that was fitted to the shape of the cell at each time step). For all time points where the velocity of the cell is not zero, we determine the angle between velocity and orientation of the cell, and plot the normalized histogram of those angles.

### Simulations

Based on the experimental observations, the cells in our simulations each consist of two spheres with radius  $r = 0.5 \mu\text{m}$  at a distance  $d = 0.6 \mu\text{m}$

between their centers. The number of pili is  $N_p = 10$  and their mean length is  $l_p = 2.0 \mu\text{m}$ . The surface of the cell is divided in 10 equal sections. In every section one pilus is attached at a random position. The pili grow into a direction that is randomly chosen from a direction with an angle of up to  $\pi/10$ , with respect to the direction perpendicular to the surface. The velocity of the growing and retracting pili is  $v_e = v_r = 2 \mu\text{m/s}$  and the pulling force is  $f_p = 100 \text{ pN}$ . We determine the total force  $\mathbf{F}_{\text{tot}}$  on the cell by adding the pulling forces of all pili,

$$\mathbf{F}_{\text{tot}} = \sum_{j=1}^{N_p} \mathbf{F}_j.$$

The total torque is given by

$$\mathbf{M}_{\text{tot}} = \sum_{j=1}^{N_p} \mathbf{r}_j \times \mathbf{F}_j,$$

where  $\mathbf{r}_j$  denotes vectors from the center of mass of the cell to the anchoring points of pili. The motion of the cell is determined by solving the overdamped equations of motion:  $dr_{\parallel}/dt = \mu_{\parallel} F_{\parallel}$  for the direction parallel to the symmetry axis,  $dr_{\perp}/dt = \mu_{\perp} F_{\perp}$  for the perpendicular direction, and  $d\phi/dt = \mu_{\text{rot}} |\mathbf{M}|$  for the rotation. We chose the effective mobility of the cell in a way that the velocity distribution from simulations is comparable to the one obtained in experiments: for a motion along the symmetry axis (line connecting the centers of two cocci, see *dashed line* in Fig. 4), the mobility is  $\mu_{\parallel} = 1.4 \times 10^4 \text{ m/(Ns)}$ ; for mobility in the perpendicular direction, we assume  $\mu_{\perp} = \mu_{\parallel} r/(r + d/2)$ ; and for the rotation,  $\mu_{\text{rot}} = 3\mu_{\perp}/4$ .

Note that this effective mobility is much smaller than the mobility of the cell body in water calculated according to the Stoke's law. We neglect the cell surface friction, assuming that pulling forces are mainly along the substrate with a negligible normal component responsible for friction. There is also no indication of substrate-related traps, inasmuch as we can observe cells that freely pass regions on a surface where they were previously trapped. The ratio  $f_{th}/f_p = 1.43$  and the pili attachment probabilities  $A = 0.5$  or  $A = 0.9$  are chosen such that the distributions of moving and trapping times are similar in experiment and simulations. The mean pili detachment time  $\tau_s = 600 \text{ s}$  is determined by comparing the decay of the tail of the trapping time distribution in simulations to that in experiments. We did not consider Brownian motion in the simulations. That leads to a sharper peak at zero velocity for the speed distribution in simulations as compared to the experimental data (see Fig. S1 in the Supporting Material), where Brownian motion of the cell, flexibility of pili, and fluctuations in pili pulling force and its dependence on load result in two broader peaks of the speed distribution. We choose the threshold velocity that determines the trapping event in the simulated data in a similar fashion, with respect to separating two velocity peaks, but having a different numerical value  $v_{th}^{\text{num}} = 0.2 \mu\text{m/s}$ . In the simulations, we followed the trajectory of the cell over a time of  $4.2 \times 10^7 \text{ s}$ .

## RESULTS

We track individual isolated cells of wild-type *N. gonorrhoea* bacteria (MS11 strain) for an extended period of time, up to 25 min. This is a biologically relevant timescale when the motility and interaction of bacteria with each other and host cells leads to the formation of bacterial aggregates and trigger reactions from host cells (21). We image tracks with 1-Hz capturing frequency to identify moving and trapping events, and use higher magnification and 2-Hz frequency for the analysis of the cell orientation during twitching (see Materials and Methods for the details of the experimental setup, and see Movie S1 in the Supporting Material). A typical trajectory of the cell is shown in Fig. 1, where cell positions at 1-s intervals are marked by

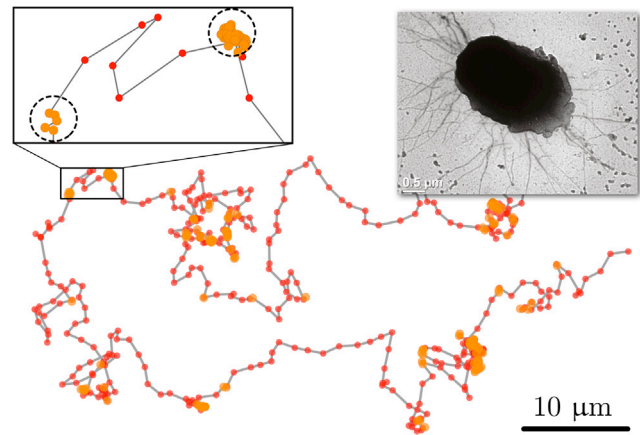

FIGURE 1 Typical trajectory of an *N. gonorrhoea* cell. Points denote the location of the cell centroid on 1-s intervals. During trapping events (denoted by *larger circles*), the cell speed is low and its position does not change more than half of the cell size (denoted by a *dashed circle* of radius  $0.5 \mu\text{m}$  on the zoomed piece of the trajectory). (*Inset*) TEM image of the diplococcus with multiple pili (scale bar is  $0.5 \mu\text{m}$ ).

dots. A micrograph on the inset shows the transmission electron microscopy (TEM) image of the *N. gonorrhoea* cell body surrounded by multiple pili filaments. We calculate cell velocities from the time series of the bacteria's displacements. The speed distribution  $P(|\mathbf{v}|)$  of the ensemble of cells has two distinct peaks, as shown in Fig. 2. There is a pronounced peak at zero speed, which implies that there must be pausing events when the cell does not move at all. The second peak at  $\sim 0.9 \mu\text{m/s}$  reflects a typical speed of active motion of a cell. To probe the trapping events, we define the threshold speed  $v_{th} = 0.4 \mu\text{m/s}$ , and identify a sequence of points where the speed of the cell is below this threshold;

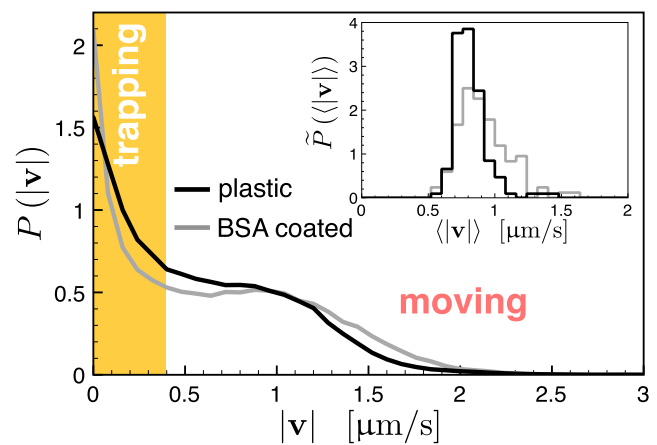

FIGURE 2 Probability distribution of bacterial speed during twitching for two different surface coatings. (*Shaded region*) Trapping events with speeds below the threshold  $v_{th} = 0.4 \mu\text{m/s}$ . Typical moving speed is  $0.9 \mu\text{m/s}$ . BSA coating does not change the speed distribution qualitatively. (*Inset*) Probability distribution  $\tilde{P}(\langle |\mathbf{v}| \rangle)$  of bacteria average moving speeds calculated for each trajectory. It indicates a rather uniform behavior among individual cells from different sets of experiments.

this represents a possible trap. In addition, we require that the cells do not leave the circle of the trap radius  $r_t = 0.5 \mu\text{m}$  approximately one-half of the cell size (see *zoomed part* of the trajectory in Fig. 1); these two conditions allow us to identify trapping events and their duration. (On the sample trajectory of Fig. 1, *small* and *larger points* indicate the movement and trapped states of the cell, respectively.)

The distribution of trapping times has a shape resembling that of a double-exponential function, which on a semilogarithmic plot would look like two straight lines with different slopes. It is indicative of two regimes: short trapping events of duration 0–20 s, and much longer trapping events with a characteristic time of several minutes, as shown in Fig. 3. The average trapping time obtained from the data is  $2.98 \pm 0.05$  s, but there is a distinct tail with trapping events lasting longer than 1 min. The distribution of moving times is closer to a single-exponential distribution but still has a tail of data indicating longer moving intervals; the average moving time is  $4.27 \pm 0.04$  s. In addition to tracking experiments that give information about the macroscopic behavior of the cell during its motion, we are able to characterize the motion of the cell on a more detailed level. *N. gonorrhoeae* bacteria have a shape of a diplococcus—two spheres merged together, which allows us to define the orientation of the cell by the tilt of the axis that connects the two spheres. We use a higher magnification to determine the cell orientation and at each time step, when the speed of the cell is nonzero, find the angle between the direction of the cell velocity and its orientation,  $\phi$ . The distribution of these angles,  $F(\phi)$ , has a maximum at  $\phi = 90^\circ$  showing that cells have a clear preference for moving in the direction orthogonal to the axis connecting two

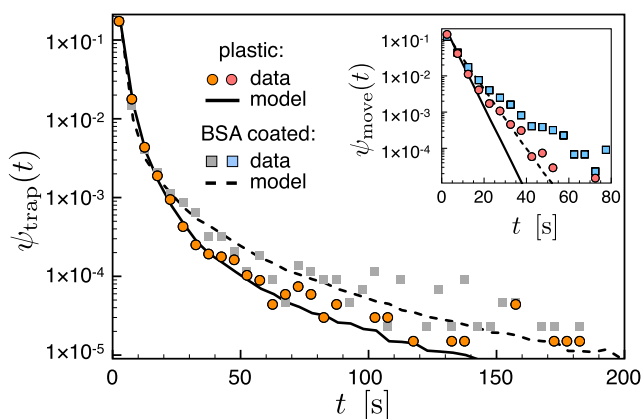

FIGURE 3 Probability density function of trapping and moving times. Trapping time has two distinct regimes of faster and slower decay attributed to two trapping mechanisms. Coating the surface with BSA leads to longer trapping events. However, moving time is also increased on a BSA-coated surface (*inset*). (Solid and dashed lines) Results of two-dimensional simulations of the model. For the trapping time, the model gives a very good match and accounts properly for different coatings of the surface. Although the simulations also reproduce the average value of moving times, the shape of the distribution deviates from the simulated curve for longer times.

cocci—by its wider side forward (Fig. 4 and see *Movie S1*)—behavior that was noted previously (12,13).

We would like to show that orientation of the cell and its displacements are the results of collective pili operation. Although cell trajectories are sufficient to quantify the motility pattern, to build a model for the displacement of the bacteria we need to know some key physical characteristics of the cell, such as the number of pili per bacterium, their length, and the force characteristics of pili. The number of pili per bacterium,  $N_p$ , has been determined to be  $7.7 \pm 4.4$  with an exponential distribution of pili lengths, having an average value of  $l_p = 0.9 \pm 0.1 \mu\text{m}$  (12). Analysis of electron micrographs of MS11 bacteria enables us to measure the number and length of pili:  $N_p = 29 \pm 15$  and  $l_p = 1.2 \pm 0.4 \mu\text{m}$ , respectively (see *Materials and Methods*). The trapping events that we observe have not previously been reported for *N. gonorrhoeae*. Previous measurements were restricted to shorter timescales and cover-glass surface coated with BSA (12). In our measurements of cell trajectories, we study bacteria interacting with a plastic surface (but not glass), either by itself or coated with poly-L-lysine or BSA. It is always difficult to evaluate precisely the detachment force of a pilus from a surface. However, TFP retraction force measurements with the same MS11 strain showed that pili can have binding forces to the surface which can match their pulling force (17).

## Theoretical model

We use the experimental results for the pausing and moving times and orientation of *N. gonorrhoeae* cells during their locomotion, along with the existing knowledge of pili

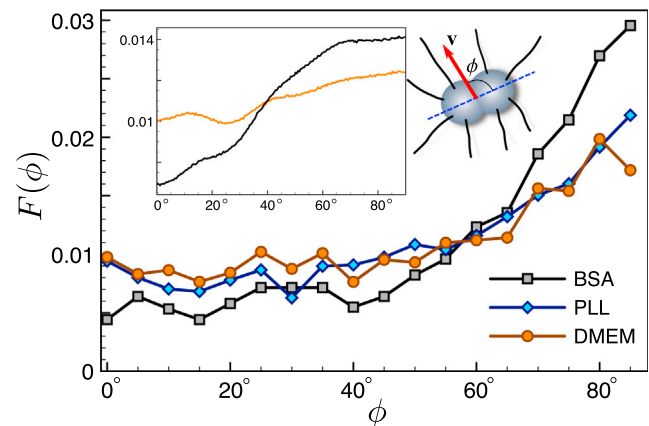

FIGURE 4 Orientation of the cell during twitching. Angular correlation function between the velocity of the cell and the axis connecting two spheres of the cell body. There is a noticeable preference toward the  $90^\circ$  angle. The effect of orientation is more pronounced for the BSA-coated surface, as explained in the text. Coating with poly-L-lysine has no visible effect on correlations that are similar to the case of the DMEM medium (see *Materials and Methods*). (*Inset*) Orientation of the cell obtained from numerical simulations of the two-dimensional model of twitching bacteria for two types of surfaces differing in the pili attachment probability  $A$ .

properties, to put forward a model that both describes the collective operation of multiple pili and explains the motility mechanism of *N. gonorrhoeae* bacteria.

We assume that individual pili work independently of each other (11), and first will define what a single pilus can do. Each pilus can extend to a length whose value is random but can be well characterized by an exponential distribution (12) with an average length,  $l_p$ . The extension of pili occurs at speed  $v_e$ . After elongation, the pilus tries to attach to the surface; attachment is considered to be a stochastic process with  $A$  denoting the probability of binding to the surface, and  $1 - A$  failing to do so. The pilus then starts to retract and, if a reliable contact with the surface is formed, generates a pulling force  $f_p$  (Fig. 5 a). The retraction speed of the pilus depends on the load it experiences (22). We relate the pilus retraction speed and pulling force by an effective friction coefficient of the cell body in the overdamped limit. If the pilus fails to attach, it retracts freely with a speed  $v_r$  without exerting any force on the

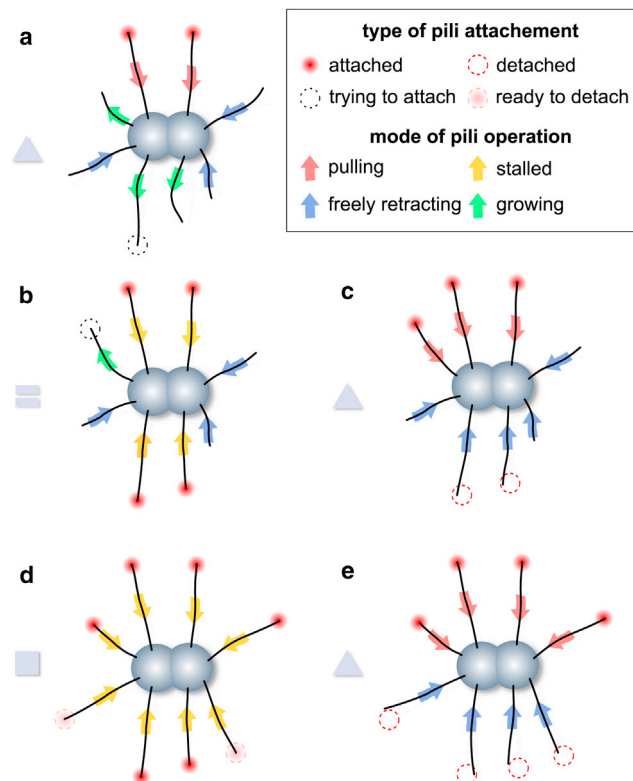

**FIGURE 5** Model for the twitching motility. (a) Pili, which are attached to the surface and retract, propel the cell forward (shown by *inward arrows* and *circles* around their tips). (*Outward arrows*) Growing pili. A pilus that is trying to attach to the surfaces is shown (*dashed circle* around its tip). Those pili that failed to attach retract without generating any force acting on the cell (*inward arrows*; no circle at the tips). (b) Pili are pulling against each other and trap the cell. (c) A new coming pilus can attach and break the force balance, thus pulling the cell out of the trap. (d and e) When most of pili are trapped, some of them may randomly detach from the surface (*dashed circles*), giving an advantage to their opponents and releasing the cell from a longer trap.

cell. Previous results (11) and optical tweezer measurements indicate that retraction of the pilus occurs approximately at the same speed as its elongation (22). In the model, a pilus starts to regrow immediately after it is completely retracted. It is therefore important to follow the retracting pilus to know when a new pilus can regrow in the system; this is consistent with the concept that the total number of pili  $N_p$  is fixed because there is a limited pool of pilin protein which is recycled to produce only a limited amount of filaments.

The motion of the cell is governed by the collective dynamics of  $N_p$  pili surrounding the cell body. Multiple pili can pull at the same time in different directions with the same force,  $f_p$ . They can pull cooperatively or compete against each other. If a pilus experiences a net force from all other pulling pili larger than its own pulling force, it stalls (23). This pilus is able to withstand a load up to a threshold value,  $f_{th} > f_p$ . If the load force exceeds this threshold value, then the pilus detaches from the surface and retracts freely. If collective disposition of pulling pili is such that a force acting on each of the individual pili is above the pulling force but below the threshold value, the cell is trapped (Fig. 5, b and d).

Exit from the trap occurs in one of the following ways: an additional pilus or pili attaches to the surface and changes the force balance, leading to the total load force acting on one or several pili larger than a threshold force (Fig. 5 c). In this case, after the detachment of overloaded pili, the remaining subset of attached pili pulls the cell forward (Fig. 5 c). Alternatively, almost all pili of the cell can be trapped, and new attaching pili are not able to break the force balance (Fig. 5 d); this leads to an infinite trapping time. Therefore, we assume that pili can withstand a load only for a certain time. We assume this time to be random and exponentially distributed with some characteristic time  $t_s$ . Hence, some pili randomly start to detach and alternate the force balance, which releases the cell from the trap (Fig. 5 e). We argue that these two mechanisms correspond to the two characteristic regimes in the experimentally measured trapping times. The motion of the cell is due to the deployment of multiple pili (12). The period of the motion is terminated when the number of pulling pili decreases and some of the pili aiming in the opposite direction successfully attach to the surface, bringing the cell to a stop (Fig. 5 b). This cycle then repeats. We argue that the proposed set of microscopic rules for the collective operation of multiple pili is capable of explaining the experimentally observed behavior of *N. gonorrhoeae* cells. We use numerical simulations to quantitatively relate the model and experimental data.

## Numerical simulations

To simulate the bacteria, we restrict our calculations to two spatial dimensions. We explicitly include the geometry of the cell, which we assume to be two spheres with radius  $r = 0.5 \mu\text{m}$ , with a separation  $d = 6.0 \mu\text{m}$  (circles in two-dimensional projection). Pili grow at random in the radial

direction, at positions uniformly distributed along the cell circumference. Every attached pilus pulls with a force  $f_p$ , which we set to be equal to 100 pN (23). After calculating the total force and torque acting on the cell, we determine the velocity and the rotation of the cell by solving the overdamped equations of motion. If the total force and torque acting on the cell lead to motion where an attached pilus (or several pili) has to become longer, then the cell is stopped. If the total force acting on each pilus remains below the threshold,  $f_{th}$ , the cell is considered to be trapped. If the force acting on a pilus in a stopped cell is larger than  $f_{th}$ , then the pilus detaches from the surface and the new balance of forces is recalculated. In the simulations, we use overdamped equations of motion with the sources of randomness coming from the length of pili, their probability to attach, and exponentially distributed time for which a pilus can withstand its load. Further details of the simulation are given in [Materials and Methods](#) (see [Movie S2](#)). Depending on the parameters, we find two main regimes of motion of the cell.

For a small ratio of  $f_{th}/f_p$ , most pili that try to pull in a direction opposite to the direction of motion are detached. Therefore, the cell is in the moving state most of the time, and typical trapping times are small. In the other regime with large  $f_{th}/f_p$ , the cell is stalled most of the time and moving times are small. For intermediate values of  $f_{th}/f_p$ , typical moving and trapping times are comparable, similar to what we observe in the experiments. By proper choice of the parameters, close correspondence of simulations and experimental data can be achieved ([Fig. 3](#)). The calculated distribution of trapping times has two distinct regimes, whereas the moving times are better described by a single exponential function. We note that the proposed mechanism for multiple pili operation assumes that pili can hold to the surface stronger than they can pull. It provides explanation for the trapping with two characteristic regimes and nearly single-exponential moving time distribution. It also describes nearly 180° reversals visible in the individual cell trajectories—events when one side of the cell wins over the other and reverses the direction of velocity (see [Movie S1](#)). Previous experiments suggesting cooperative pili operation (12) were performed on much shorter timescales (~1 min) and on a different type of substrate that apparently had much less pili interaction. We believe those are the key reasons why the trapping events were not previously reported.

### Dependence on parameters

The theoretical model relies on six essential parameters giving a large space for optimization. Due to the assumption of independent work of individual pili, we can use the properties of random processes to predict the effects of different parameters on the motility of cells. In addition, available experimental data often provides a range in which some of the parameters can vary.

### Pili extension and retraction speed

Pilus retraction speed,  $u_r$ , is directly related to the typical moving speed of the cell, as confirmed by previous work (10,11,22). We therefore vary the retraction speed in the range 1–3  $\mu\text{m/s}$  to achieve average cell moving speeds consistent with the experiments. The final value of 2  $\mu\text{m/s}$  we use is consistent with previous findings for gonorrhoeae bacteria (10,11,22). The pili growth speed was shown to be similar to the retraction (11), and therefore we fix them together in our simulations  $v_r = v_e$ .

### Pili length

We vary the average pili length in the range 1–3  $\mu\text{m}$ . Existing methods to measure pili length are invasive and cause pili to break up, leading to an underestimation of their length. As some individual TEM images in this article and in Holz et al. (12) demonstrate, pili often appear to be several microns long. In our model, the length of pili, divided by their growing speed ( $l_p/u_e$ ), is the essential time-scale defining the pili turnover time, and therefore moving time and short trapping times. By increasing the pilus length we extend the time required for a new pilus to attach and perturb the force balance, leading to a prolongation of short traps (initial slope of the trapping time distribution curve). This also extends the moving times because a longer pilus can pull for a longer time. By matching simulations and the model, we achieve the best results for  $l_p \sim 2 \mu\text{m}$ .

### Number of pili

The number of pili affects all aspects of motility. Average time for a new pilus to attach is of the order of pili turnover time divided by ( $N_p \cdot A$ ):  $t_1 \propto N_p^{-1} l_p u_e^{-1} A^{-1}$ . Therefore, it defines a major timescale in the model. Larger  $N_p$  extends the regime of short traps that can be resolved by newly attaching pili. The rate of pili detachment in stalled cells is proportional to  $N_p/\tau_s$  and affects the tail of long trapping times. Larger  $N_p$  also can extend moving times: if pili on one side of the cell are turning over sufficiently fast, they will also maintain a high average number of simultaneously pulling pili, making it difficult for pili to attach on the opposite side of the cell. We get the best match of the experimental data with  $N_p = 10$ . The *N. gonorrhoeae* cells have pili surrounding the whole cell body, therefore also growing out perpendicular to the surface upon which motility occurs. Only those pili situated close to the surface can contribute to the cell motility. In the model, it is therefore reasonable to have  $N_p$  values that are smaller than the total number of pili per cell we measured. In addition,  $N_p = 10$  is also the value that falls between the value reported previously in Holz et al. (12) ( $N_p = 7.2$ ) and our measurements.

### Ratio of threshold and pulling force

A force that can be generated by a TFP motor is a well-characterized quantity that sets the force scale in our model. In

the model, for the cell to be able to move, the ratio  $f_{th}/f_p$  should be larger than 1. For values close to 1, almost any excess over the pulling force detaches the pilus from the substrate and no trapping is possible. This regime could correspond to conditions of Holz et al. (12). In the opposite case of a high threshold force, the cells will be trapped most of the time. This ratio also contributes to the transition between short and long traps: if a cell uses up all available pili and is not able to break the force balance (for example, due to a high threshold force), it turns into a stalled situation of a longer trap. Also, a large value of the threshold force shortens the movement periods: it is easier for a single newly attaching pilus to compete with pili that are already pulling. In our experiments, moving times are comparable to the trapping times, implying an intermediate value of the ratio, which we determine to be  $f_{th}/f_p = 1.43$ . We show how the behavior of trapping and moving times changes in response to  $f_{th}/f_p$  in Fig. S2.

#### Pilus detachment time

In the model, we used a single time constant  $\tau_s$ , which does not depend on the applied force, to describe the stochastic detachment of pili under load. It is directly responsible for the tail of pausing times pertinent to long traps. If a pilus can withstand its load only for a short time, the long time tail of trapping disappears. For very large  $\tau_s$ , the tail of trapping times starts to saturate due to very long trapping events that are not resolved in time of simulations. The value of  $\tau_s = 600$  s leads to the best match of the tail of trapping times; in the case of 10 stalled pili, it corresponds to a detachment rate of one pilus/min. We show how the tail of the trapping times distribution responds to the variation of this parameter in Fig. S3.

#### Pilus attachment probability

Attachment probability has an obvious limitation  $0 \leq A \leq 1$  and contributes to the time required for a new pilus to attach, which is  $t_1 \propto N_p^{-1} l_p \mu_e^{-1} A^{-1}$ . As it is seen from this relation, changing  $A$  can have similar effects on timescales as changing the number of pili. However, they are not completely interchangeable; for example, in the detachment of stalled pili,  $A$  has no effect, whereas  $N_p$  plays an essential role.

To conclude this subsection, we see that there is a number of parameters in the model (see Table 1), but also a corresponding number of experimental features to match,

**TABLE 1** List of the parameters used in the simulations

| $N_p$ | $l_p$ [ $\mu\text{m}$ ] | $v_e, v_r$ [ $\mu\text{m/s}$ ] | $\tau_s$ [s] | $A$ | $f_p$ [pN] | $f_{th}/f_p$ |
|-------|-------------------------|--------------------------------|--------------|-----|------------|--------------|
| 10    | 2.0                     | 2.0                            | 600          | 0.5 | 100        | 1.43         |

The number and mean length of pili are denoted by  $N_p$  and  $l_p$ , respectively. Their extension and retraction speed is  $v_e$  and  $v_r$ . The average time for which a pilus can withstand its load is  $\tau_s$ . The probability to attach, the pulling force, and the ratio of the threshold force to the pulling force are denoted by  $A$ ,  $f_p$ , and  $f_{th}/f_p$ , respectively. For the BSA-coated surface, the value of  $A$  has to be set to 0.9.

including full distribution of trapping times with two regimes, and moving times distribution. Most of the parameters, such as  $N_p$ ,  $l_p$ ,  $v_r$ ,  $v_e$ , and  $f_p$ , have only a very limited variation range fixed by the experimental data. The remaining  $A$ ,  $\tau_s$ , and  $f_{th}/f_p$  can be considered as true fitting parameters.

#### Test of the model

The model predicts that the trapping and moving times behave in a certain way depending on the parameters of the problem. One of the easiest ways to check the validity of the model is to repeat the tracking experiments with a different coating of the surface. Within this model, this should change the distribution of moving and trapping events. Indeed, experiments show that BSA-coated plastic surfaces have longer average trapping and moving times:  $3.77 \pm 0.14$  and  $5.96 \pm 0.09$  s, respectively. It is consistent with previous observations on *P. aeruginosa* bacteria showing that BSA can stimulate their twitching, potentially by enhancing the binding of TFP to the substrate (24). The parameters of the model that can have this effect are the increased attachment probability  $A$  and the ratio of the threshold to the pulling force  $f_{th}/f_p$ . This is exactly what we obtain in the model: the attachment probability,  $A$ , must be increased to fit the second set of data on Fig. 3. In Table 1, we summarize the parameters that we use to fit the experimental data for the BSA-coated and uncoated surfaces.

The model also reproduces the average moving times for both surfaces. Long runs, as, for example, seen in some parts of a trajectory in Fig. 1, are also present in the model and constitute the tail of the nearly exponential run-time distribution. However, the model deviates from the data on a far tail for runs longer than 30 s. The deviation is small (note the semilogarithmic scale) but certainly detectable. An additional mechanism for even longer runs could be a reduced attachment probability in the direction opposite to that of the cell motion. When a pilus is trying to attach and start to pull against the motion of the cell, it immediately experiences a load of already pulling pili, thus reducing its chances to form a stable bond to the surface. By contrast, when trying to attach and pull cooperatively in the current moving direction, the attachment can only be hampered by elastic forces of the bending pilus, which is much smaller.

Remarkably, numerical simulations qualitatively describe the orientation of the cell during its motion, and how it changes depending on a type of a surface. We argue that, by a simple geometrical effect, a larger number of pili on the longer side of the cell leads to longer runs in the corresponding direction. Longer runs are explained by the larger number of pili available to attach and keep the cell moving, whereas with a smaller number of pili there is a higher probability to trap the cell. Similarly, cells on the coated surface

have longer moving intervals, and a more pronounced preference of the cell to orient itself perpendicular to the direction of motion, moving by its wider side forward. Finally, we also directly visualize the dynamics of pili by using TIRF microscopy. This is possible to do only for a very short period of time ( $\leq 10$  s) and in different experimental conditions (see [Materials and Methods](#)). Therefore, TIRF data cannot be directly compared with other results of this article. Nevertheless, it confirms that several pili engage to propel the cell (see [Fig. 6](#) and see [Movie S3](#)), and they can also trap the cell (see [Movie S4](#)).

## DISCUSSION

Our model consists of the microscopic rules for the individual pilus cycle and the algorithm of collective pili operation based on the principle of the force balance. It has a minimal set of ingredients that allow the description of the experimentally observed trapping of the cell and the correlation of the orientation and the direction of motion. Remarkably, even this simple model is quantitatively successful, and consistently reproduces results for two different types of surface coatings. However, although the model might perform well in this study, it disregards a number of known pili-related effects that might be of importance in other situations. We list those properties briefly to provide a more complete picture of twitching motility.

### Detailed properties of type IV pili

The retraction velocity of pili has a well-defined force dependence in that large loads result in lower retraction speeds (22,25). In what are now classic experiments, Skerker and Berg (11) also observed that pili did not always retract to the very end at once—they could pause. Moreover, pili do not necessarily start to grow right after retracting to the end. A pause may occur before the motor switches to the extension of the pilus. Similarly, pili disassembly is not necessarily correlated with attachment. Additionally, under a large load pili can experience a conformational change, leading to strong elongation without rupturing (18). Multi-

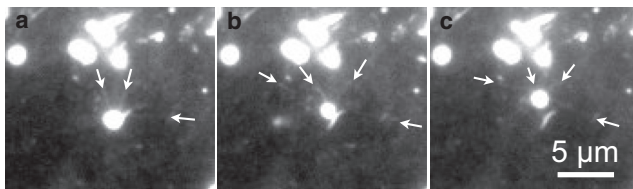

**FIGURE 6** TIRF imaging of pili dynamics. Three snapshots of the moving cell with a time difference of 0.67 s. (Bright ellipsoidal spots) Cell bodies. (Arrows) Positions of presumed pili attachment points and the direction of the pilus fiber that were manually identified in frame-by-frame analysis of the recorded movies (see the [Supporting Material](#)). Note how several pili simultaneously engage in pulling the cell. See [Movie S3](#) in the [Supporting Material](#).

ple pili can also form bundles, with a pulling force of the bundle being significantly higher than that of a single pilus (17). We have also suggested that the attachment probability in the direction opposite to current active motion may be reduced. Although these features of pili are not included in the model, some of them can be accounted for by a suitable renormalization of parameters. For example, the retraction or extension speed might take into account pausing during growth or retraction of pili; pausing of motors before growing a new pilus could be taken into account through the effective number of active pili. Most of these features can be implemented directly in our simulations. Therefore, we believe that the model describes the general mechanism of twitching of *N. gonorrhoeae* bacteria, while complying with a more complex phenomena involving the TFP.

### Search strategy

It might seem inefficient for a cell to have pili surrounding its body and often competing with each other. However, *M. xanthus* bacteria can organize TFP relevant motors in a well-defined spatio-temporal pattern resulting in the alternating activity of pili on the opposite poles of the cell (26). When pili work on one pole of the cell, it moves forward with high persistence. By reversing the leading pole, it also abruptly changes the direction of motion, providing the major mechanism for effective exploration of the neighborhood. The frequency of reversals is connected to the chemotactic genetic pathway of the cell (27). We believe that pili of *N. gonorrhoeae* play a similar role in reorienting the cell after exiting from the trap, as often seen in trajectories, and therefore help it explore its neighborhood. Cells are surrounded by pili from all sides; due to the remarkable length and dynamical extension and retraction of pili, bacteria are able to probe an area significantly larger than the cell size. When finding a neighbor, cells can pull together, utilizing the strong retraction force of pili and building a microcolony (28).

## CONCLUSIONS

We propose a model that describes the microscopic dynamics of individual pili and how multiple pili coordinate to propel *N. gonorrhoeae* bacteria. Although each pilus works independently, when several pili engage in pulling, the geometrical force balance determines whether the cell is going to move or stall. Numerical simulations take into account the actual geometry of the cell and therefore are easily applicable to rod-shaped bacteria as well, such as *P. aeruginosa* and *M. xanthus* (14–16,26,27). We show that by changing pili substrate interactions, the motion of bacteria can be altered in a predictable way. The knowledge of the *N. gonorrhoeae* cell motility is essential for the understanding of bacterial dispersal and formation of microcolonies. In the light of the rapid increase in the number of cases



when gonorrhea infection is resistant to multiple common antibiotics, it is important to find new potential targets for the drugs of the next generation (29). Interfering with pili-driven bacterial motility may be one of the possible ways to inhibit the dispersal *N. gonorrhoeae*, and therefore can help control the progression of the gonorrhea infection.

## SUPPORTING MATERIAL

Three figures, and four movies are available at [http://www.biophysj.org/biophysj/supplemental/S0006-3495\(14\)00809-1](http://www.biophysj.org/biophysj/supplemental/S0006-3495(14)00809-1).

We note that a related article by B. Maier, S. Klumpp, and collaborators on the tug-of-war mechanism in twitching *N. gonorrhoea* (30) was published during the revision of this manuscript. The authors thank H. Stark, H. Vlamakis, M. P. Brenner, and S. Redner, for useful discussions, and M. Downton for performing the earlier version of two-dimensional simulations of the theoretical model.

Our research was supported by BASF and through the grants of the Deutsche Forschungsgemeinschaft No. ZA593/2-1 (to V.Z.) and No. SCHM2657/2 (to M.S.).

## REFERENCES

- Berg, H. C. 2004. *E. coli* in Motion. Springer, New York.
- Jarrell, K. F., and M. J. McBride. 2008. The surprisingly diverse ways that prokaryotes move. *Nat. Rev. Microbiol.* 6:466–476.
- Costerton, J. W., P. S. Stewart, and E. P. Greenberg. 1999. Bacterial biofilms: a common cause of persistent infections. *Science.* 284: 1318–1322.
- Hall-Stoodley, L., J. W. Costerton, and P. Stoodley. 2004. Bacterial biofilms: from the natural environment to infectious diseases. *Nat. Rev. Microbiol.* 2:95–108.
- O’Toole, G. A., and R. Kolter. 1998. Flagellar and twitching motility are necessary for *Pseudomonas aeruginosa* biofilm development. *Mol. Microbiol.* 30:295–304.
- Lautrop, H. 1961. Bacterium anitratum transferred to the genus *Cytophaga*. *Int. Bull. Bacteriol. Nomencl.* 11:107–108.
- Burrows, L. L. 2005. Weapons of mass retraction. *Mol. Microbiol.* 57:878–888.
- Proft, T., and E. N. Baker. 2009. Pili in Gram-negative and Gram-positive bacteria—structure, assembly and their role in disease. *Cell. Mol. Life Sci.* 66:613–635.
- Mattick, J. S. 2002. Type IV pili and twitching motility. *Annu. Rev. Microbiol.* 56:289–314.
- Merz, A. J., M. So, and M. P. Sheetz. 2000. Pilus retraction powers bacterial twitching motility. *Nature.* 407:98–102.
- Skerker, J. M., and H. C. Berg. 2001. Direct observation of extension and retraction of type IV pili. *Proc. Natl. Acad. Sci. USA.* 98:6901–6904.
- Holz, C., D. Opitz, ..., B. Maier. 2010. Multiple pilus motors cooperate for persistent bacterial movement in two dimensions. *Phys. Rev. Lett.* 104:178104.
- Holz, C., D. Opitz, ..., B. Maier. 2009. Bacterial motility and clustering guided by microcontact printing. *Nano Lett.* 9:4553–4557.
- Gibiansky, M. L., J. C. Conrad, ..., G. C. L. Wong. 2010. Bacteria use type IV pili to walk upright and detach from surfaces. *Science.* 330:197.
- Jin, F., J. C. Conrad, ..., G. C. L. Wong. 2011. Bacteria use type-IV pili to slingshot on surfaces. *Proc. Natl. Acad. Sci. USA.* 108:12617–12622.
- Shen, Y., A. Siryaporn, ..., H. A. Stone. 2012. Flow directs surface-attached bacteria to twitch upstream. *Biophys. J.* 103:146–151.
- Biais, N., B. Ladoux, ..., M. Sheetz. 2008. Cooperative retraction of bundled type IV pili enables nanoNewton force generation. *PLoS Biol.* 6:e87.
- Biais, N., D. L. Higashi, ..., M. P. Sheetz. 2010. Force-dependent polymorphism in type IV pili reveals hidden epitopes. *Proc. Natl. Acad. Sci. USA.* 107:11358–11363.
- Craig, L., N. Volkmann, ..., J. A. Tainer. 2006. Type IV pilus structure by cryo-electron microscopy and crystallography: implications for pilus assembly and functions. *Mol. Cell.* 23:651–662.
- Swanson, J., S. J. Kraus, and E. C. Gotschlich. 1971. Studies on gonococcus infection. I. Pili and zones of adhesion: their relation to gonococcal growth patterns. *J. Exp. Med.* 134:886–906.
- Merz, A. J., and M. So. 2000. Interactions of pathogenic *neisseriae* with epithelial cell membranes. *Annu. Rev. Cell Dev. Biol.* 16:423–457.
- Clausen, M., M. Koomey, and B. Maier. 2009. Dynamics of type IV pili is controlled by switching between multiple states. *Biophys. J.* 96:1169–1177.
- Maier, B., L. Potter, ..., M. P. Sheetz. 2002. Single pilus motor forces exceed 100 pN. *Proc. Natl. Acad. Sci. USA.* 99:16012–16017.
- Whitchurch, C. B. 2006. Biogenesis and function of type IV pili in *Pseudomonas* species. In *Pseudomonas* Vol. 4: Molecular Biology of Emerging Issues. J.-L. Ramos and R. C. Levesque, editors. Springer, Dordrecht, Netherlands, pp. 139–188.
- Maier, B. 2013. The bacterial type IV pilus system—a tunable molecular motor. *Soft Matter.* 9:5667–5671.
- Bulyha, I., C. Schmidt, ..., L. Søgaard-Andersen. 2009. Regulation of the type IV pili molecular machine by dynamic localization of two motor proteins. *Mol. Microbiol.* 74:691–706.
- Vlamakis, H. C., J. R. Kirby, and D. R. Zusman. 2004. The Che4 pathway of *Myxococcus xanthus* regulates type IV pilus-mediated motility. *Mol. Microbiol.* 52:1799–1811.
- Higashi, D. L., S. W. Lee, ..., M. So. 2007. Dynamics of *Neisseria gonorrhoeae* attachment: microcolony development, cortical plaque formation, and cytoprotection. *Infect. Immun.* 75:4743–4753.
- Kirkcaldy, R. D., S. Kidd, ..., G. A. Bolan. 2013. Trends in antimicrobial resistance in *Neisseria gonorrhoeae* in the USA: the Gonococcal Isolate Surveillance Project (GISP), January 2006–June 2012. *Sex. Transm. Infect.* 89 (Suppl 4):iv5–iv10.
- Marathe, R., C. Meel, ..., S. Klumpp. 2014. Bacterial twitching motility is coordinated by a two-dimensional tug-of-war with directional memory. *Nat. Commun.* 5:3759.

## Supporting Material

### Uncovering the mechanism of trapping and cell orientation during *Neisseria gonorrhoeae* twitching motility

Vasily Zaburdaev, Nicolas Biais, Michael Schmiedeberg, Jens Eriksson, Ann-Beth Jonsson, Michael P. Sheetz, and David A. Weitz

#### Dependence of the theoretical model on parameters

##### Velocity distribution

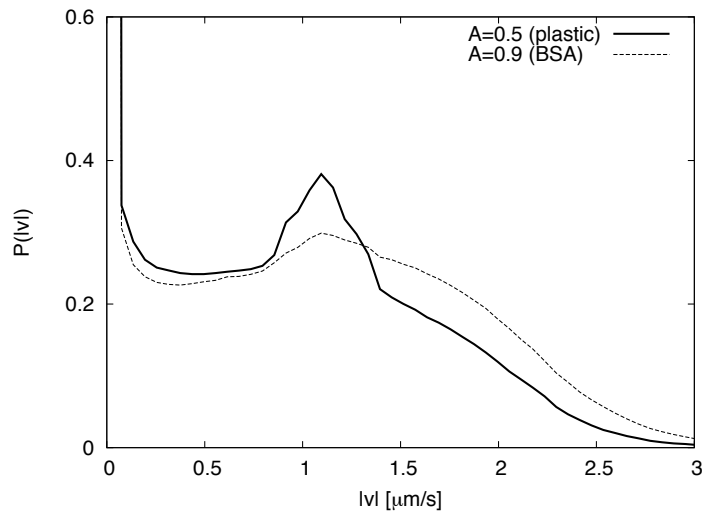

**Figure S1:** Speed distribution obtained in simulations. Simulated cell trajectories are sampled with the same time resolution as in the experiments. The major difference to the measured speed distribution is a narrower peak at zero speed. As explained in the main text possible reasons could be that in simulations we neglect Brownian motion, force fluctuations, force-velocity dependence, and elasticity of pili. Solid and dashed lines represent plastic and BSA coated plastic conditions respectively.

### Ratio of threshold and pulling force

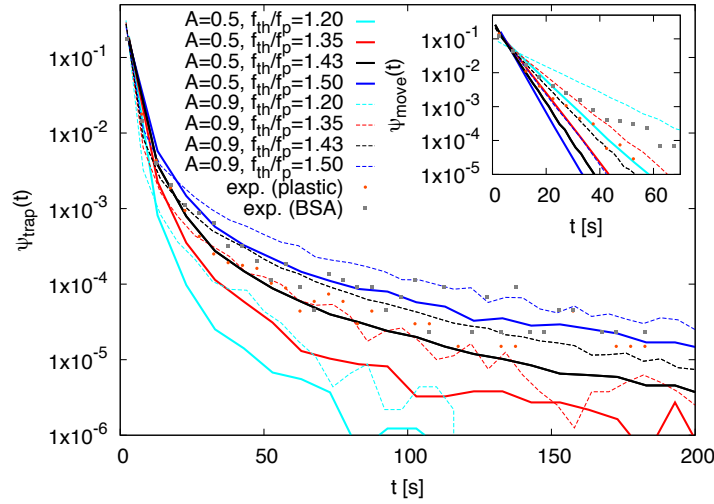

**Figure S2:** Dependence of trapping and moving times on the ratio of the threshold and pulling forces. This ratio is the central parameter making the traps possible for  $f_{th}/f_p > 1$ . It affects both short and long trapping regimes, and moving times. For  $f_{th}/f_p$  values close to 1 there are almost no traps and the cell is mostly moving (see cyan solid and dashed curves). As the ratio starts to increase, traps become longer (from red to blue lines) and moving times shorter. Different colors correspond to different values of the ratio, solid and dashed lines represent two attachment probabilities  $A=0.5$  and  $0.9$  respectively, whereas red and gray dots reserved for the experimental data.

### Pili detachment time

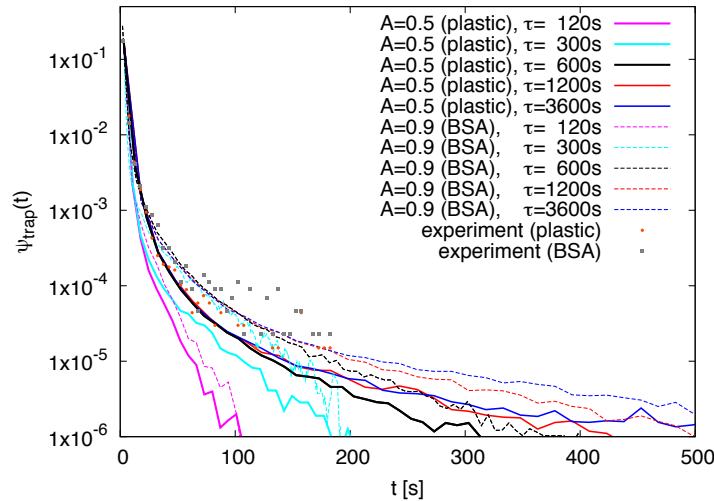

**Figure S3:** Dependence of trapping time distribution on average pili detachment time. We see how the tail of the trapping time distribution gradually appears as the detachment time is increased (curves from pink to blue; solid and dashed lines for two attachment probabilities  $A=0.5$  and  $0.9$ ). The value  $\tau_s=600$  s is what we use to match the experimental data (dots).
